# Supplementary material for: Theoretical prediction and characterization of novel two-dimensional ternary tetradymite compounds La2X2Y (X = I, Br, Cl; Y = Ge, Te) as anode materials for metal-ion batteries
Source: Royal Society of Chemistry journal article supplement (doi:10.1039/d3cp02920d), 2023-01-01
Supplement: d3cp02920d1.pdf [file d3cp02920d1.pdf]

## Supporting Information for

# **Theoretical Prediction and Characterization of Novel Two-Dimensional Ternary Tetradymite Compounds $\text{La}_2\text{X}_2\text{Y}$ ( $\text{X} = \text{I}, \text{Br}, \text{Cl}$ ; $\text{Y} = \text{Ge}, \text{Te}$ ) as Anode Materials for Metal-Ion Batteries**

Nisar Muhammad<sup>§,†</sup>, M. U. Muzaffar<sup>†,‡</sup> and Z.J. Ding<sup>§,\*</sup>

*<sup>§</sup>Hefei National Research Center for Physical Sciences at the Microscale and Department of Physics, University of Science and Technology of China, Hefei, Anhui 230026, P.R. China*

*<sup>†</sup>International Center for Quantum Design of Functional Materials (ICQD), Hefei National Laboratory for Physical Sciences at the Microscale (HFNL), and CAS Center for Excellence in Quantum Information and Quantum Physics, University of Science and Technology of China, Hefei, Anhui 230026, P.R. China*

<sup>‡</sup> N.M. and M.U.M. contributed equally to this work.

\*E-mail: [zjding@ustc.edu.cn](mailto:zjding@ustc.edu.cn)

## Supporting figures:

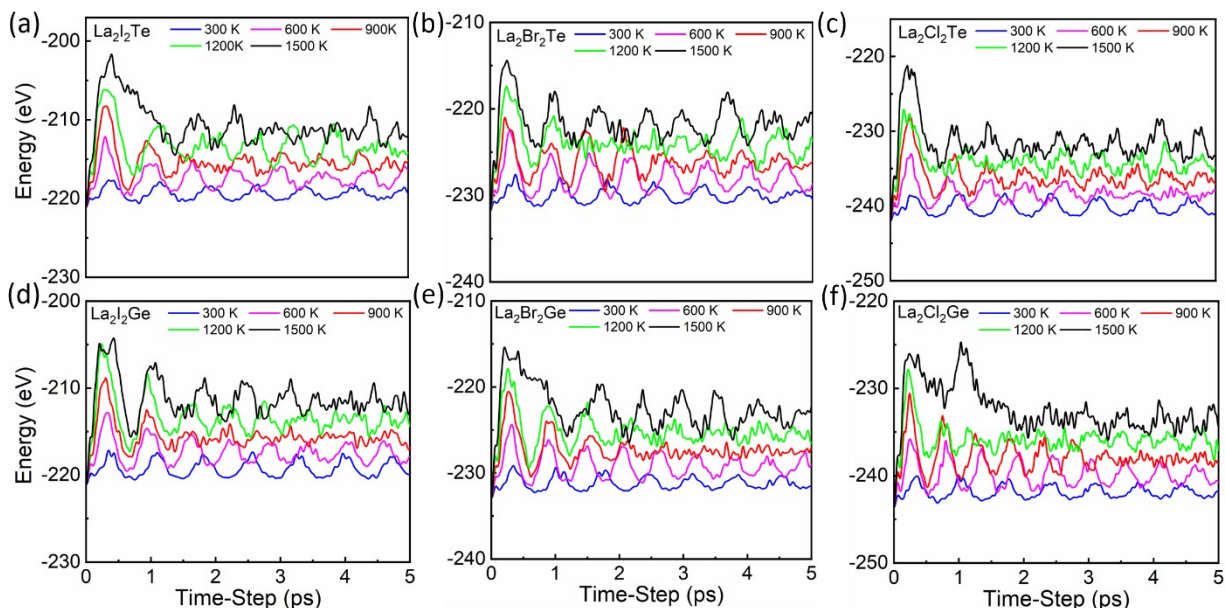

Fig. S1 Evolutions of the total energy of  $\text{La}_2\text{X}_2\text{Y}$  ( $\text{X} = \text{I}, \text{Br}, \text{Cl}$ ;  $\text{Y} = \text{Ge}, \text{Te}$ ) nanosheets during the AIMD simulations from 300-1500 K up to 5 ps. These results indicate that  $\text{La}_2\text{X}_2\text{Y}$  nanosheets are thermodynamically stable.

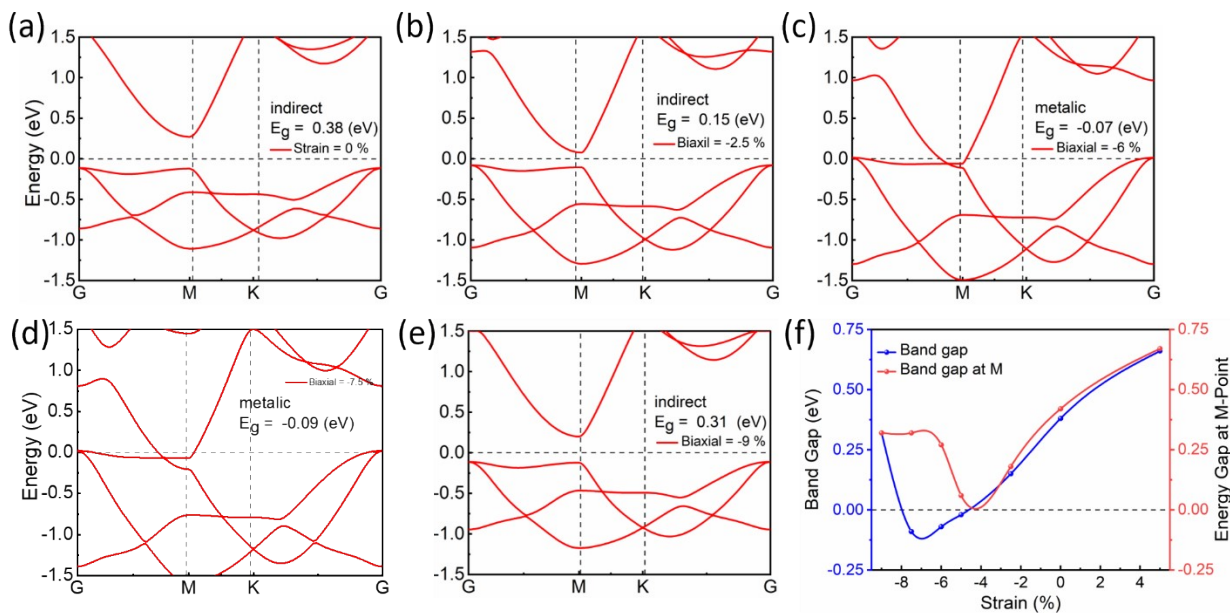

Fig. S2 Electron band structure of  $\text{La}_2\text{I}_2\text{Ge}$ , (a) no strain (b), 2.5% (c), 6 % (d) 7 % (e) 9 % biaxial compressive strain. And (f) depicts that band gap nearly closes at 6 % compressive strain, and reopens with further increase of the compressive strain.

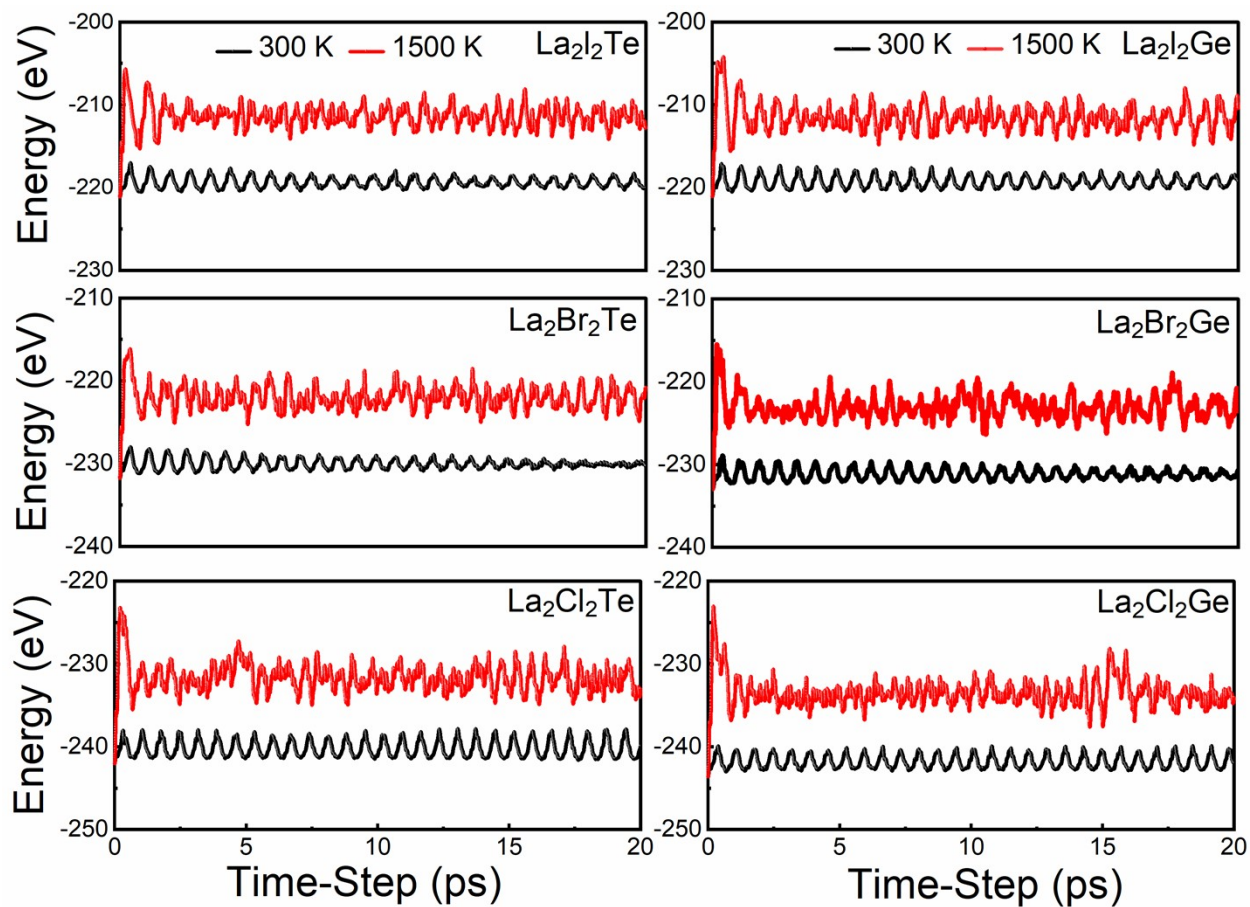

Fig. S3 Evolutions of the total energy of  $\text{La}_2\text{X}_2\text{Y}$  ( $\text{X} = \text{I}, \text{Br}, \text{Cl}$ ;  $\text{Y} = \text{Ge}, \text{Te}$ ) nanosheets during the AIMD simulations at 300, and 1500 K up to 20 ps. These results indicate that  $\text{La}_2\text{X}_2\text{Y}$  nanosheets are thermodynamically stable.

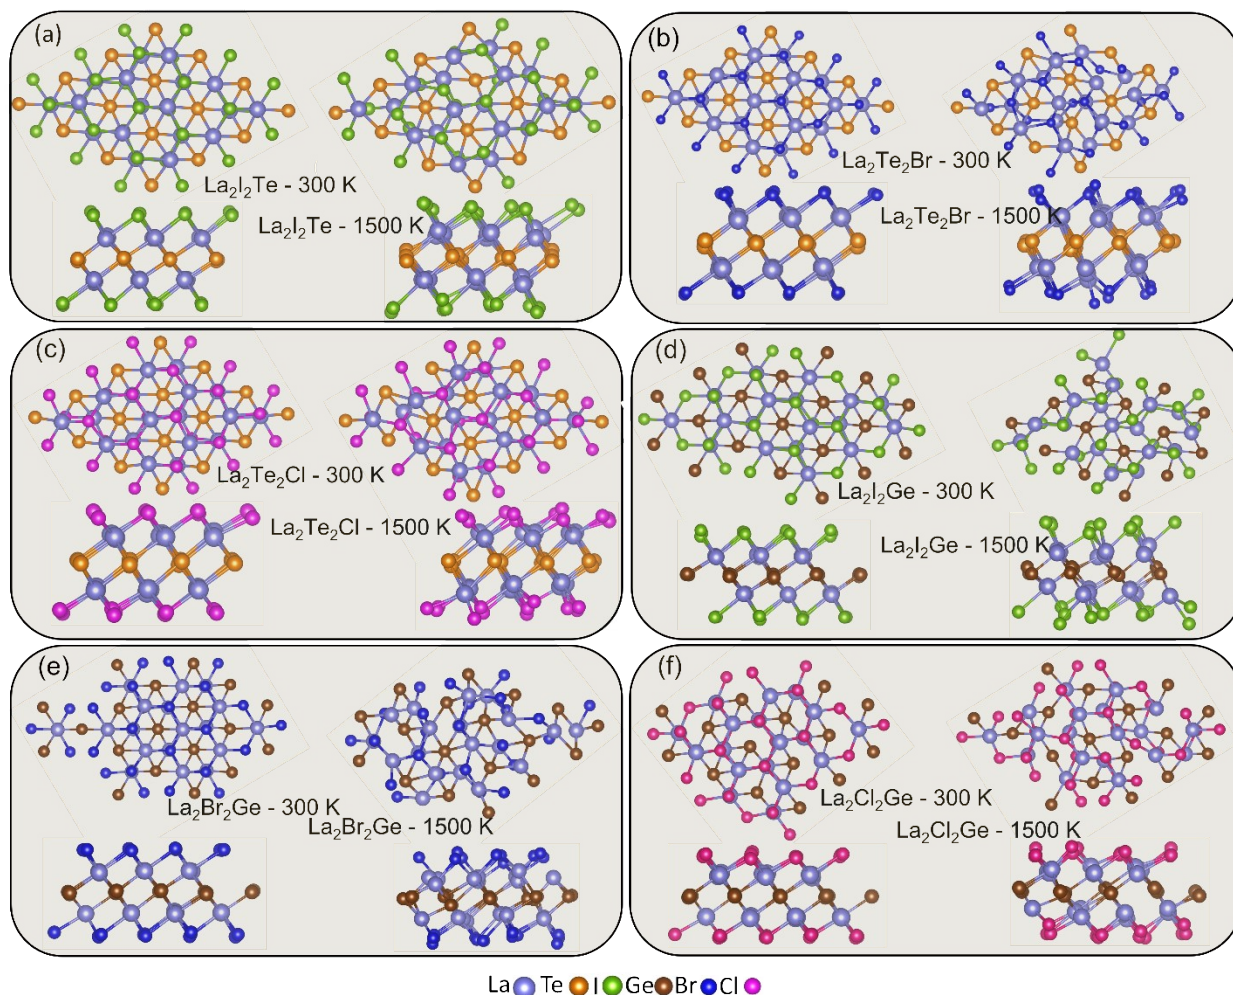

Fig. S4 Geometric structure of  $\text{La}_2\text{X}_2\text{Y}$  ( $\text{X} = \text{I}, \text{Br}, \text{Cl}$ ;  $\text{Y} = \text{Ge}, \text{Te}$ ) nanosheets during the AIMD simulations at 300, and 1500 K, simulated up to 20 ps. Geometrics structure indicate that  $\text{La}_2\text{X}_2\text{Y}$  nanosheets are thermodynamically stable.

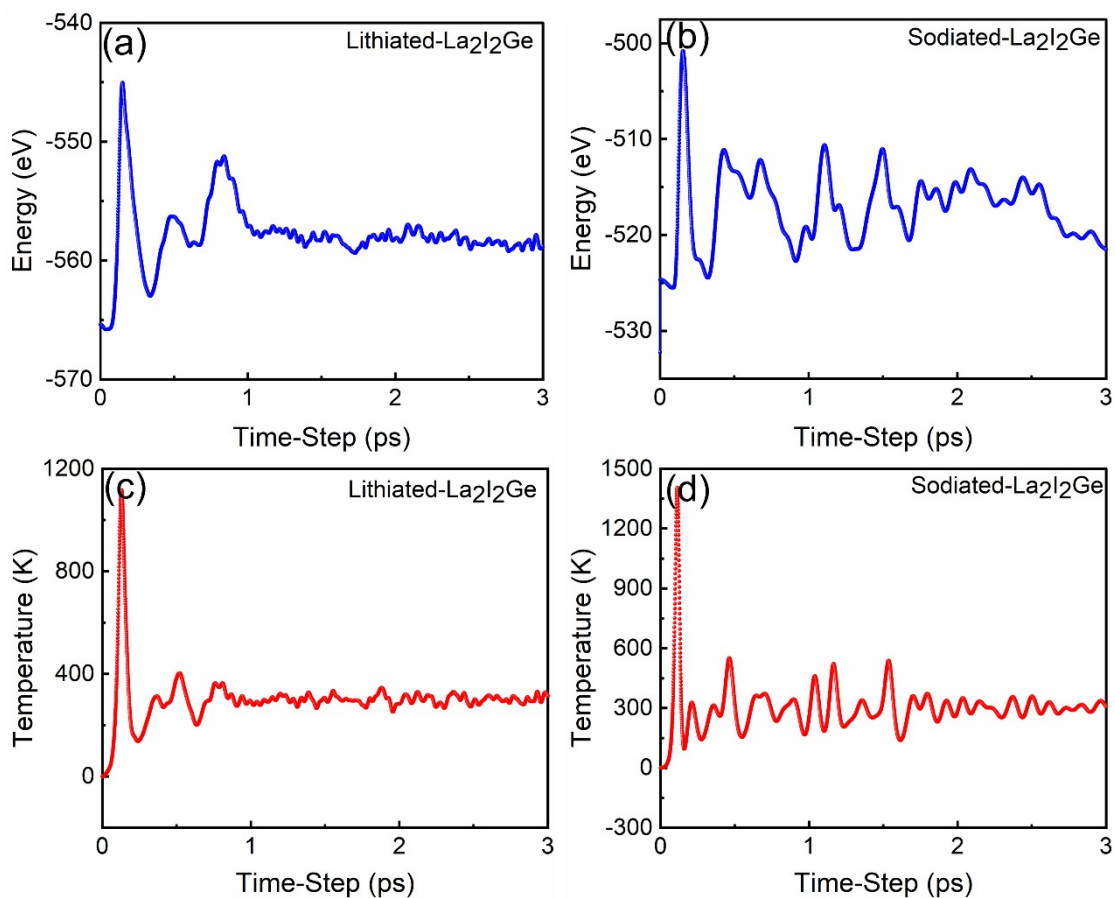

Fig. S5 Evolutions of the total energy and temperature of fully lithated and sodiated  $\text{La}_2\text{I}_2\text{Ge}$  nanosheets during the AIMD simulations at 300 up to 3 ps. These results indicate that  $\text{La}_2\text{I}_2\text{Ge}$  nanosheets are thermodynamically stable.

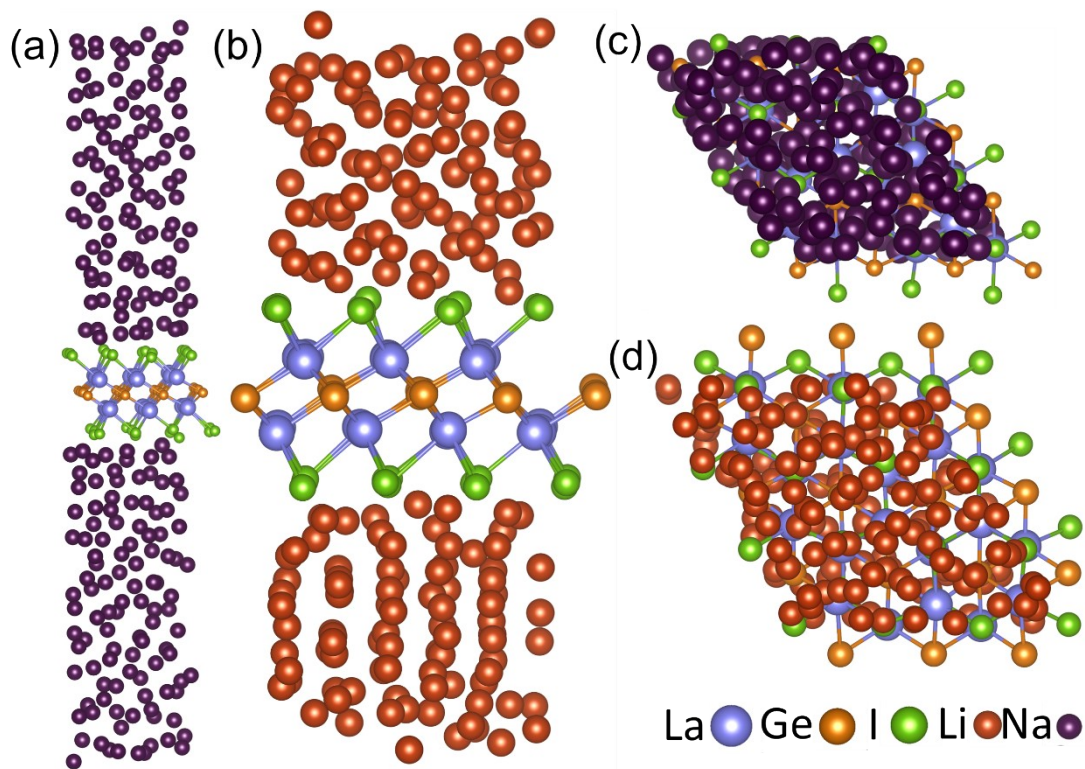

Fig. S6 Geometric configurations of  $\text{La}_2\text{I}_2\text{Ge}$  nanosheets during AIMD simulations at 300K over 3 ps. (a, b) Side views; (c, d) Top views. The structures suggest thermodynamic stability in fully lithiated/sodiated states.

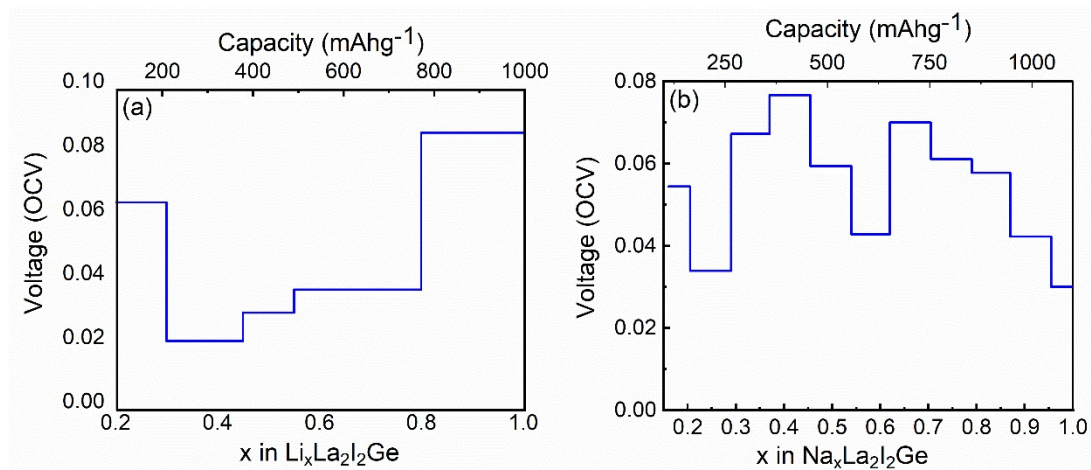

Fig. S7 Open-circuit voltage (OCV) as a function of the (a) Li concentration  $x$ , and (b) Na concentration  $x$
